# Supplementary material for: Greenhouse Gas Emissions from Respiratory Treatments: Results from the SABA CARBON International Study
Source: Springer Nature journal article supplement (doi:10.1007/s12325-023-02663-2), 2023-09-09
Supplement: MOESM1 [file 26024228]

**Article Type: Original Research****Title:**

**Greenhouse Gas Emissions From Respiratory Treatments: Results From the SABA CARBON International Study**

**Authors:**

Ashraf Alzaabi<sup>1</sup>, John P. Bell<sup>2</sup>, Felicia Montero-Arias<sup>3</sup>, David B. Price<sup>4</sup>, David J. Jackson<sup>5</sup>, Hao-Chien Wang<sup>6</sup>, Nigel Budgen<sup>7</sup>, Hisham Farouk<sup>8</sup> and Ekaterina Maslova<sup>9</sup>

**Affiliations:**

<sup>1</sup>Respiratory Medicine Division, Zayed Military Hospital, Abu Dhabi, United Arab Emirates [ORCID: 0000-0001-9840-2339]

<sup>2</sup>BioPharmaceutical Medical, Medical Affairs Respiratory and Immunology, AstraZeneca, Baar, Switzerland [ORCID: 0000-0001-9307-1235]

<sup>3</sup>Servicio de Neumología, Hospital México, CCSS y Hospital Clínica Bíblica Santa Ana, San José, Costa Rica [ORCID: 0000-0003-2909-6619]

<sup>4</sup>Observational and Pragmatic Research Institute, Singapore; Centre of Academic Primary Care, Division of Applied Science, University of Aberdeen, Aberdeen, United Kingdom. [ORCID: 0000-0002-9728-9992]

<sup>5</sup>Guy's Severe Asthma Centre, King's College London, London, United Kingdom [ORCID 0000-0002-2299-868X]

<sup>6</sup>Department of Medicine, National Taiwan University Cancer Center, Taipei City, Taiwan [ORCID: 0000-0002-7528-7494]

<sup>7</sup>Global Sustainability, AstraZeneca, Macclesfield, United Kingdom [ORCID: 0000-0001-8857-804X]

<sup>8</sup>International Medical, AstraZeneca, Dubai, United Arab Emirates [ORCID: 0000-0001-9445-3307]

<sup>9</sup>BioPharmaceutical Medical, Medical Affairs Respiratory and Immunology, AstraZeneca, Cambridge, United Kingdom [ORCID: 0000-0001-5415-8119]

**Correspondence:**

Ashraf Alzaabi

Respiratory Medicine Division

Zayed Military Hospital

Abu Dhabi, United Arab Emirates

**Email:** [ashrafalzaabi@uaeu.ac.ae](mailto:ashrafalzaabi@uaeu.ac.ae)

**Contact number:** +971 506 474 488

**ORCID iD:** 0000-0001-9840-2339

## Supplementary material

### SUPPLEMENTARY METHODS

#### Study Design and Population

##### *SABINA III analyses*

Patient eligibility criteria for SABINA III have been described previously [1]. Patients aged  $\geq 12$  years with a documented diagnosis of asthma,  $\geq 3$  consultations with a healthcare practitioner and medical records containing data for  $\geq 12$  months preceding the study visit were included. Patient data were recorded on electronic case report forms during the study visit to a primary care physician or a respiratory medicine specialist. Patients with a diagnosis of other chronic respiratory diseases, such as chronic obstructive pulmonary disease, or with an acute respiratory condition that in the opinion of the investigator would prevent them from attending the study visit were excluded. Informed consent was obtained from all patients or their legal guardians.

#### Study Variables

Greenhouse gas (GHG) emissions were quantified over a 12-month period using the following formula:

$$\sum \text{CO}_2\text{e emission value}_{\text{SABA or ICS-containing medication item}} \times n_{\text{item used/prescribed}}$$

*CO<sub>2</sub>e* carbon dioxide equivalent, *ICS* inhaled corticosteroids, *SABA* short-acting  $\beta_2$ -agonist

The principles of Greenhouse Gas Protocol Pharmaceutical and Medical Device Sector Guidance for Product Life Cycle Accounting 2012 and the World Business Council for Sustainable Development, World Resources Institute 2011 Product Life Cycle Accounting and Reporting Standard were followed in estimating the GHG emissions of AstraZeneca asthma medications.

### **Sensitivity Analysis**

Product life cycle assessments (LCAs) generated using the global warming potential (GWP) values of hydrofluoroalkanes (HFAs) for a 100-year time period from the Intergovernmental Panel on Climate Change Fourth Assessment Report (IPCC AR4) compared with those generated using the IPCC Fifth Assessment Report (AR5) resulted in a negligible (1.4%) increase in total pressurised metered-dose inhaler (pMDI)–related GHG estimates [2]. Product LCAs generated using GWP of HFAs for a 100-year time period from the IPCC Sixth Assessment Report (AR6) compared with IPCC AR5 resulted in an 8.1% increase in total pMDI–related GHG estimates [3]. Similarly, the variation in calculations of GHG estimates based on recently published studies [4-7] and modelled estimates revealed a 0.2% increase in total dry powder inhaler–related GHG estimates.

## SUPPLEMENTARY FIGURES

**Supplementary Fig. S1** (A) Overview of IQVIA MIDAS data collection\* and (B) types of data sources.

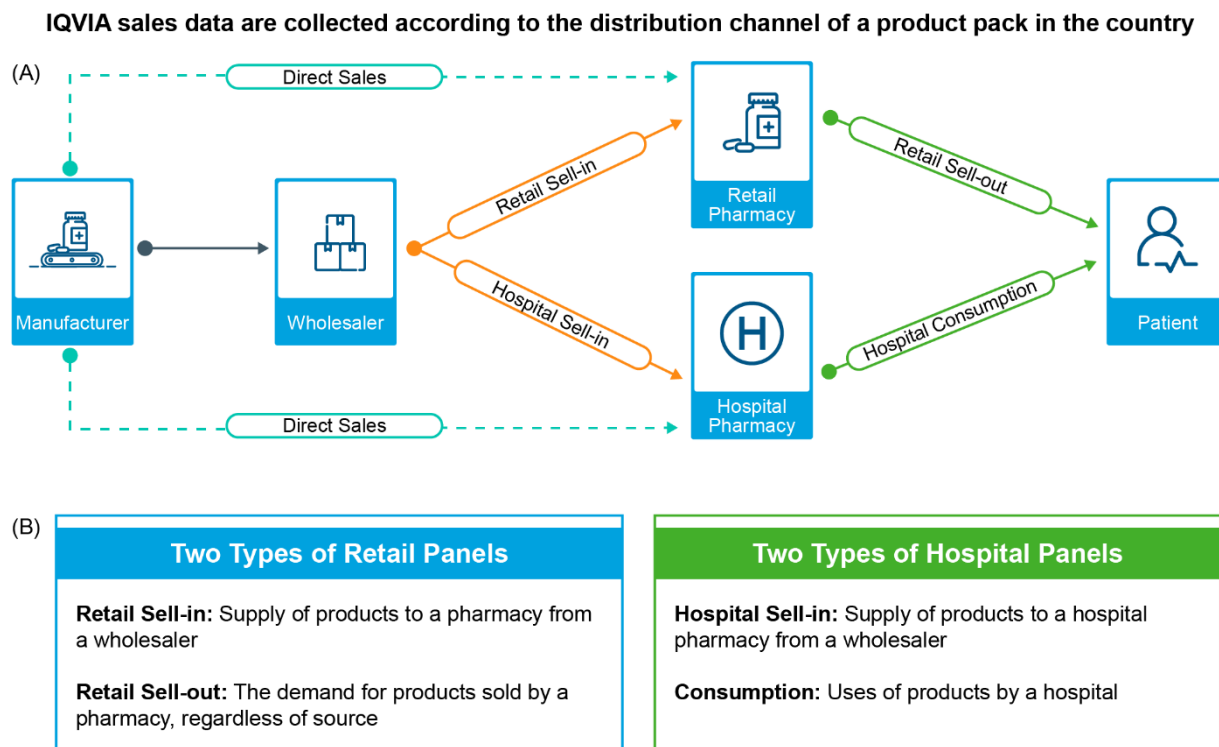

\*Depending on the country, data is collected at different points in this distribution channel. Data is collected at sell-in for all retail and hospital panels, with a few exceptions.

**Supplementary Fig. S2** Per capita SABA and controller medication use and associated GHG emissions based on the IQVIA MIDAS sales data\* stratified by geographical region.

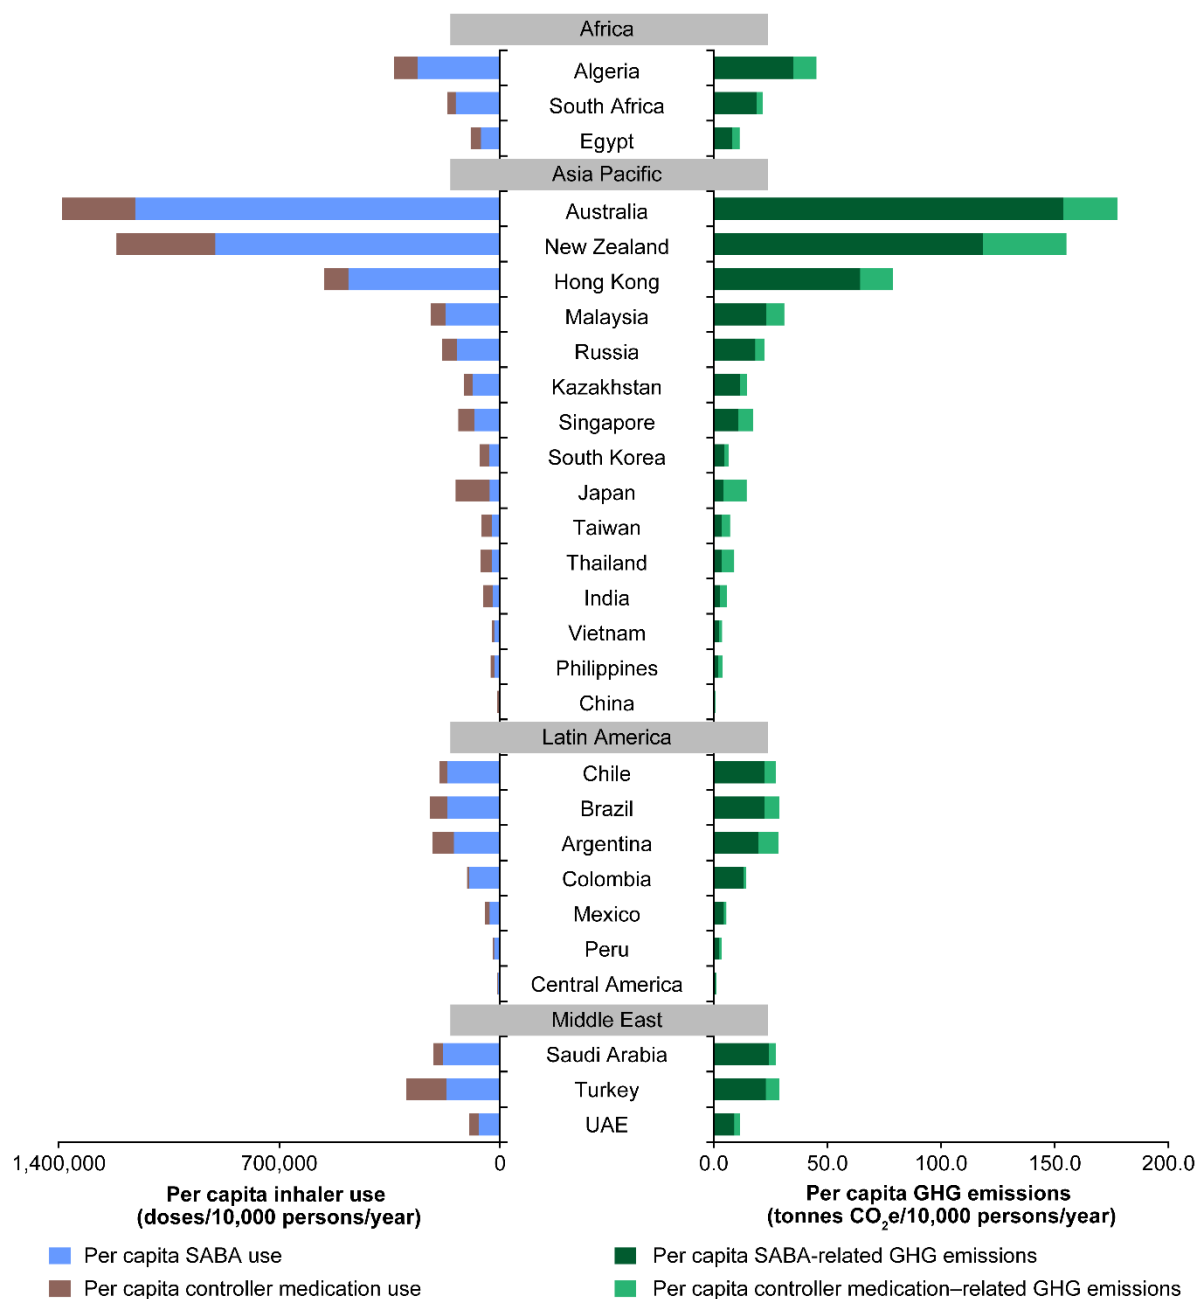

\*Based on internal analysis by the authors using IQVIA MIDAS<sup>®</sup> data, reflecting estimates of real-world activity. Copyright IQVIA. All rights reserved.

CO<sub>2</sub>e carbon dioxide equivalent, GHG greenhouse gas, *per capita* per 10,000 persons/year, SABA short-acting  $\beta_2$ -agonist, UAE United Arab Emirates

**Supplementary Fig. S3** Per capita SABA and controller medication use and associated GHG emissions based on the IQVIA MIDAS sales data\* stratified by gross national income<sup>†</sup>.

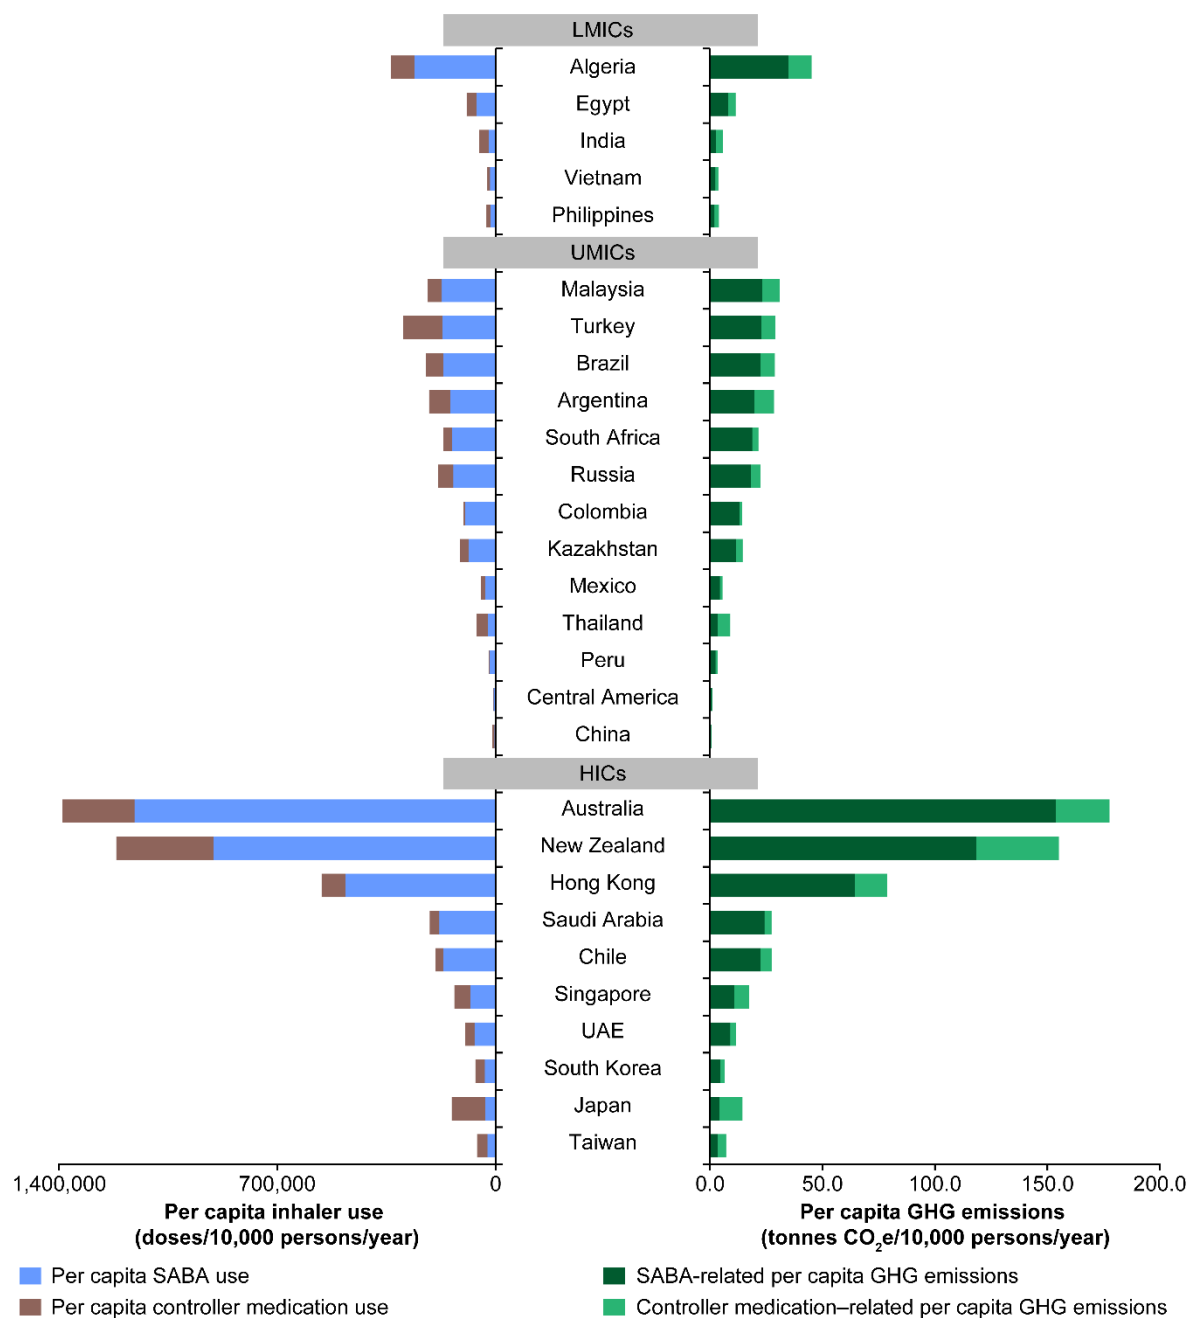

\*Based on internal analysis by the authors using IQVIA MIDAS<sup>®</sup> data, reflecting estimates of real-world activity. Copyright IQVIA. All rights reserved.

<sup>†</sup>Gross national income per capita based on the 2020 World Bank classifications [8]: LMIC, 1046 USD–4095 USD; UMIC, 4096 USD–12,695 USD; HIC, >12,695 USD.

*CO<sub>2e</sub>* carbon dioxide equivalent, *GHG* greenhouse gas, *per capita* per 10,000 persons/year, *HIC* high-income country, *LMIC* lower-middle-income country, *SABA* short-acting  $\beta_2$ -agonist, *UAE* United Arab Emirates, *UMIC* upper-middle-income country, *USD* United States Dollar



## SUPPLEMENTARY TABLES

**Supplementary Table S1** Estimates of GHG emissions associated with medication use

| <b>Drug</b>                                                   | <b>Drug class</b> | <b>Device</b> | <b>Minimum carbon footprint of device (kg CO<sub>2</sub> eq/device)</b> | <b>Maximum carbon footprint of device (kg CO<sub>2</sub> eq/device)</b> | <b>References</b> |
|---------------------------------------------------------------|-------------------|---------------|-------------------------------------------------------------------------|-------------------------------------------------------------------------|-------------------|
| Beclomethasone dipropionate                                   | ICS               | pMDI          | 12.4                                                                    | 19.6                                                                    | [9-12]            |
| Beclomethasone dipropionate                                   | ICS               | DPI           | 0.4                                                                     | 0.8                                                                     | [9,11,12]         |
| Ciclesonide                                                   | ICS               | pMDI          | 8.4                                                                     | 12.6                                                                    | [10]              |
| Fluticasone propionate                                        | ICS               | pMDI          | 17.9                                                                    | 19.3                                                                    | [9,10]            |
| Fluticasone propionate                                        | ICS               | DPI           | 0.5                                                                     | 0.9                                                                     | [9,12,13]         |
| Mometasone furoate                                            | ICS               | pMDI          | 47.9                                                                    | 47.9                                                                    | [10]              |
| Mometasone furoate                                            | ICS               | DPI           | 0.4                                                                     | 0.8                                                                     | [14]              |
| Beclomethasone dipropionate/formoterol fumarate dihydrate     | ICS/LABA          | pMDI          | 11.3                                                                    | 16.0                                                                    | [10,11]           |
| Beclomethasone dipropionate/formoterol fumarate dihydrate     | ICS/LABA          | DPI           | 0.5                                                                     | 0.9                                                                     | [11,12]           |
| Budesonide/formoterol fumarate dihydrate                      | ICS/LABA          | pMDI          | 22.1                                                                    | 37.6                                                                    | [10,15]           |
| Budesonide/formoterol fumarate dihydrate                      | ICS/LABA          | DPI           | 0.3                                                                     | 1.0                                                                     | [15]              |
| Fluticasone propionate/salmeterol xinafoate                   | ICS/LABA          | pMDI          | 17.9                                                                    | 19.5                                                                    | [9,10]            |
| Fluticasone propionate/salmeterol xinafoate                   | ICS/LABA          | DPI           | 0.9                                                                     | 0.9                                                                     | [9]               |
| Fluticasone furoate/vilanterol trifenate/umeclidinium bromide | ICS/LABA/LAMA     | DPI           | 0.8                                                                     | 0.8                                                                     | [9]               |
| Formoterol fumarate dihydrate/mometasone furoate              | ICS/LABA          | pMDI          | 32.4                                                                    | 47.9                                                                    | [10]              |
| Formoterol fumarate dihydrate                                 | LABA              | pMDI          | 12.0                                                                    | 12.0                                                                    | [10]              |
| Formoterol fumarate dihydrate                                 | LABA              | DPI           | 0.3                                                                     | 0.8                                                                     | [12,13,15]        |
| Salmeterol xinafoate                                          | LABA              | pMDI          | 12.6                                                                    | 26.9                                                                    | [9,10]            |
| Salmeterol xinafoate                                          | LABA              | DPI           | 0.6                                                                     | 0.9                                                                     | [9]               |
| Acclidinium bromide                                           | LAMA              | DPI           | 0.7                                                                     | 1.5                                                                     | [15]              |
| Glycopyrronium bromide                                        | LAMA              | DPI           | 0.7                                                                     | 0.8                                                                     | [13,15]           |
| Umeclidinium bromide                                          | LAMA              | DPI           | 0.7                                                                     | 0.9                                                                     | [9]               |
| Acclidinium bromide/formoterol fumarate dihydrate             | LABA/LAMA         | DPI           | 0.7                                                                     | 1.5                                                                     | [15]              |
| Indacaterol maleate/glycopyrronium bromide                    | LABA/LAMA         | DPI           | 0.4                                                                     | 0.8                                                                     | [13]              |
| Olodaterol hydrochloride/tiotropium bromide                   | LABA/LAMA         | pMDI          | 16.3                                                                    | 16.3                                                                    | [10,14]           |
| Vilanterol trifenate/umeclidinium bromide                     | LABA/LAMA         | DPI           | 0.8                                                                     | 0.9                                                                     | [9]               |
| Formoterol fumarate dihydrate/glycopyrronium bromide          | LABA/LAMA         | pMDI          | 8.4                                                                     | 15.3                                                                    | [15]              |
| Salbutamol sulphate                                           | SABA              | pMDI          | 8.9                                                                     | 28.0                                                                    | [9,10,16]         |

| <b>Drug</b>          | <b>Drug class</b> | <b>Device</b> | <b>Minimum carbon footprint of device (kg CO<sub>2</sub> eq/device)</b> | <b>Maximum carbon footprint of device (kg CO<sub>2</sub> eq/device)</b> | <b>References</b> |
|----------------------|-------------------|---------------|-------------------------------------------------------------------------|-------------------------------------------------------------------------|-------------------|
| Salbutamol sulphate  | SABA              | DPI           | 0.6                                                                     | 0.8                                                                     | [9,12]            |
| Terbutaline sulphate | SABA              | DPI           | 0.5                                                                     | 0.7                                                                     | [15]              |
| Ipratropium bromide  | SAMA              | pMDI          | 15.6                                                                    | 18.4                                                                    | [10]              |

*CO<sub>2</sub>e* carbon dioxide equivalent, *DPI* dry powder inhaler, *GHG* greenhouse gas, *ICS* inhaled corticosteroids, *LABA* long-acting  $\beta_2$ -agonist, *LAMA*

long-acting muscarinic antagonist, *pMDI* pressurised metered-dose inhaler, *SABA* short-acting  $\beta_2$ -agonist, *SAMA* short-acting muscarinic antagonist

**Supplementary Table S2** Estimates of GHG emissions associated with pMDIs based on IPCC AR5 [2] by countries included in the analyses performed using IQVIA\* data and asthma medication class

|                        | <b>ICS<br/>(tonnes CO<sub>2</sub>e)</b> | <b>ICS/LABA<br/>(tonnes CO<sub>2</sub>e)</b> | <b>ICS/LAMA/LABA<br/>(tonnes CO<sub>2</sub>e)</b> | <b>LABA<br/>(tonnes CO<sub>2</sub>e)</b> | <b>LAMA<br/>(tonnes CO<sub>2</sub>e)</b> | <b>LABA/LAMA<br/>(tonnes CO<sub>2</sub>e)</b> | <b>SABA<br/>(tonnes CO<sub>2</sub>e)</b> |
|------------------------|-----------------------------------------|----------------------------------------------|---------------------------------------------------|------------------------------------------|------------------------------------------|-----------------------------------------------|------------------------------------------|
| Algeria retail         | 39,980                                  | 3007                                         | 0                                                 | 0                                        | 0                                        | 0                                             | 155,444                                  |
| Argentina retail       | 11,650                                  | 34,135                                       | 0                                                 | 0                                        | 0                                        | 0                                             | 86,215                                   |
| Australia combined     | 12,978                                  | 58,907                                       | 0                                                 | 0                                        | 0                                        | 0                                             | 354,648                                  |
| Brazil combined        | 100,865                                 | 30,553                                       | 0                                                 | 0                                        | 0                                        | 0                                             | 461,158                                  |
| Central America retail | 1875                                    | 2338                                         | 0                                                 | 0                                        | 0                                        | 0                                             | 16,633                                   |
| Chile retail           | 3901                                    | 6790                                         | 0                                                 | 53                                       | 0                                        | 0                                             | 42,495                                   |
| China hospital         | 18,944                                  | 1752                                         | 0                                                 | 0                                        | 0                                        | 0                                             | 73,250                                   |
| Colombia retail        | 4407                                    | 1110                                         | 0                                                 | 0                                        | 0                                        | 0                                             | 68,172                                   |
| Egypt retail           | 5865                                    | 26,473                                       | 0                                                 | 453                                      | 0                                        | 0                                             | 83,921                                   |
| Hong Kong combined     | 5949                                    | 9079                                         | 0                                                 | 34                                       | 0                                        | 0                                             | 48,747                                   |
| India combined         | 32,540                                  | 305,274                                      | 0                                                 | 36                                       | 22,030                                   | 8099                                          | 321,434                                  |
| Japan combined         | 14,461                                  | 100,111                                      | 119                                               | 0                                        | 0                                        | 7                                             | 54,449                                   |
| Kazakhstan combined    | 1928                                    | 3155                                         | 0                                                 | 0                                        | 0                                        | 0                                             | 22,026                                   |
| Malaysia combined      | 21,832                                  | 3609                                         | 0                                                 | 0                                        | 0                                        | 0                                             | 75,690                                   |
| Mexico combined        | 3485                                    | 14,500                                       | 242                                               | 9                                        | 0                                        | 0                                             | 54,560                                   |
| New Zealand retail     | 7914                                    | 10,098                                       | 0                                                 | 350                                      | 0                                        | 0                                             | 57,802                                   |
| Peru retail            | 1064                                    | 2027                                         | 0                                                 | 0                                        | 0                                        | 0                                             | 8389                                     |
| Philippines combined   | 431                                     | 23,077                                       | 0                                                 | 0                                        | 0                                        | 0                                             | 22,213                                   |
| Russia combined        | 26,887                                  | 23,197                                       | 0                                                 | 851                                      | 0                                        | 0                                             | 259,474                                  |
| Saudi Arabia retail    | 2386                                    | 6985                                         | 0                                                 | 0                                        | 0                                        | 0                                             | 68,443                                   |

|                           | <b>ICS<br/>(tonnes CO<sub>2e</sub>)</b> | <b>ICS/LABA<br/>(tonnes CO<sub>2e</sub>)</b> | <b>ICS/LAMA/LABA<br/>(tonnes CO<sub>2e</sub>)</b> | <b>LABA<br/>(tonnes CO<sub>2e</sub>)</b> | <b>LAMA<br/>(tonnes CO<sub>2e</sub>)</b> | <b>LABA/LAMA<br/>(tonnes CO<sub>2e</sub>)</b> | <b>SABA<br/>(tonnes CO<sub>2e</sub>)</b> |
|---------------------------|-----------------------------------------|----------------------------------------------|---------------------------------------------------|------------------------------------------|------------------------------------------|-----------------------------------------------|------------------------------------------|
| Singapore combined        | 1008                                    | 3211                                         | 0                                                 | 0                                        | 0                                        | 0                                             | 6425                                     |
| South Africa total market | 6202                                    | 8186                                         | 0                                                 | 306                                      | 0                                        | 0                                             | 102,166                                  |
| South Korea combined      | 824                                     | 11,557                                       | 0                                                 | 0                                        | 0                                        | 0                                             | 23,915                                   |
| Taiwan hospital           | 1064                                    | 9852                                         | 0                                                 | 0                                        | 0                                        | 0                                             | 8316                                     |
| Thailand hospital         | 18,015                                  | 20,335                                       | 0                                                 | 19                                       | 0                                        | 0                                             | 23,718                                   |
| Turkey retail             | 10,039                                  | 25,958                                       | 25                                                | 4                                        | 0                                        | 0                                             | 195,558                                  |
| UAE retail                | 611                                     | 2529                                         | 0                                                 | 0                                        | 0                                        | 0                                             | 9068                                     |
| Vietnam combined          | 810                                     | 10,339                                       | 0                                                 | 0                                        | 0                                        | 0                                             | 23,987                                   |

*CO<sub>2e</sub>* carbon dioxide equivalent, *GHG* greenhouse gas, *ICS* inhaled corticosteroids, *IPCC AR5* Intergovernmental Panel on Climate Change Fifth Assessment Report, *LABA* long-acting  $\beta_2$ -agonist, *LAMA* long-acting muscarinic antagonist, *pMDI* pressurised metered-dose inhaler, *SABA* short-acting  $\beta_2$ -agonist, *UAE* United Arab Emirates

\*Based on internal analysis by the authors using IQVIA MIDAS<sup>®</sup> data, reflecting estimates of real-world activity. Copyright IQVIA. All rights reserved

**Supplementary Table S3** Estimates of GHG emissions associated with DPIs based on published LCA estimates [10,11,17] by countries included in the analyses performed using IQVIA\* data and asthma medication class

|                           | <b>ICS<br/>(tonnes CO<sub>2</sub>e)</b> | <b>ICS/LABA<br/>(tonnes CO<sub>2</sub>e)</b> | <b>ICS/LABA/LAMA<br/>(tonnes CO<sub>2</sub>e)</b> | <b>LABA<br/>(tonnes CO<sub>2</sub>e)</b> | <b>LAMA<br/>(tonnes CO<sub>2</sub>e)</b> | <b>LABA/LAMA<br/>(tonnes CO<sub>2</sub>e)</b> | <b>SABA<br/>(tonnes CO<sub>2</sub>e)</b> |
|---------------------------|-----------------------------------------|----------------------------------------------|---------------------------------------------------|------------------------------------------|------------------------------------------|-----------------------------------------------|------------------------------------------|
| Algeria retail            | 136                                     | 1870                                         | 0                                                 | 246                                      | 252                                      | 0                                             | 20                                       |
| Argentina retail          | 54                                      | 2015                                         | 2                                                 | 45                                       | 140                                      | 62                                            | 0                                        |
| Australia combined        | 437                                     | 3797                                         | 129                                               | 97                                       | 607                                      | 214                                           | 466                                      |
| Brazil combined           | 469                                     | 9296                                         | 0                                                 | 506                                      | 115                                      | 145                                           | 0                                        |
| Central America retail    | 18                                      | 119                                          | 0                                                 | 36                                       | 7                                        | 9                                             | 0                                        |
| Chile retail              | 3                                       | 130                                          | 0                                                 | 0                                        | 3                                        | 14                                            | 0                                        |
| China hospital            | 58                                      | 9807                                         | 0                                                 | 86                                       | 1631                                     | 3                                             | 12                                       |
| Colombia retail           | 0                                       | 74                                           | 0                                                 | 4                                        | 11                                       | 15                                            | 0                                        |
| Egypt retail              | 1051                                    | 1140                                         | 0                                                 | 976                                      | 49                                       | 30                                            | 114                                      |
| Hong Kong combined        | 16                                      | 155                                          | 0                                                 | 3                                        | 23                                       | 29                                            | 22                                       |
| India combined            | 858                                     | 33,754                                       | 0                                                 | 95                                       | 908                                      | 710                                           | 8234                                     |
| Japan combined            | 2623                                    | 13,753                                       | 71                                                | 422                                      | 431                                      | 663                                           | 215                                      |
| Kazakhstan combined       | 7                                       | 477                                          | 0                                                 | 18                                       | 0                                        | 0                                             | 0                                        |
| Malaysia combined         | 12                                      | 748                                          | 0                                                 | 2                                        | 16                                       | 16                                            | 7                                        |
| Mexico combined           | 408                                     | 897                                          | 15                                                | 13                                       | 524                                      | 131                                           | 0                                        |
| New Zealand retail        | 121                                     | 1090                                         | 0                                                 | 12                                       | 106                                      | 30                                            | 184                                      |
| Philippines combined      | 26                                      | 1456                                         | 0                                                 | 12                                       | 49                                       | 142                                           | 882                                      |
| Russia combined           | 276                                     | 6795                                         | 0                                                 | 263                                      | 241                                      | 45                                            | 0                                        |
| Saudi Arabia retail       | 11                                      | 833                                          | 0                                                 | 0                                        | 18                                       | 7                                             | 0                                        |
| Singapore combined        | 25                                      | 199                                          | 0                                                 | 0                                        | 8                                        | 15                                            | 1                                        |
| South Africa total market | 96                                      | 1231                                         | 0                                                 | 15                                       | 53                                       | 12                                            | 16                                       |
| South Korea combined      | 63                                      | 1525                                         | 0                                                 | 14                                       | 152                                      | 214                                           | 1                                        |
| Taiwan hospital           | 15                                      | 576                                          | 0                                                 | 8                                        | 21                                       | 109                                           | 0                                        |

|                   | <b>ICS<br/>(tonnes CO<sub>2</sub>e)</b> | <b>ICS/LABA<br/>(tonnes CO<sub>2</sub>e)</b> | <b>ICS/LABA/LAMA<br/>(tonnes CO<sub>2</sub>e)</b> | <b>LABA<br/>(tonnes CO<sub>2</sub>e)</b> | <b>LAMA<br/>(tonnes CO<sub>2</sub>e)</b> | <b>LABA/LAMA<br/>(tonnes CO<sub>2</sub>e)</b> | <b>SABA<br/>(tonnes CO<sub>2</sub>e)</b> |
|-------------------|-----------------------------------------|----------------------------------------------|---------------------------------------------------|------------------------------------------|------------------------------------------|-----------------------------------------------|------------------------------------------|
| Thailand hospital | 29                                      | 1446                                         | 0                                                 | 4                                        | 104                                      | 3                                             | 26                                       |
| Turkey retail     | 465                                     | 11,750                                       | 3                                                 | 203                                      | 2148                                     | 249                                           | 0                                        |
| UAE retail        | 14                                      | 294                                          | 0                                                 | 1                                        | 4                                        | 1                                             | 5                                        |
| Vietnam combined  | 0                                       | 540                                          | 0                                                 | 3                                        | 0                                        | 15                                            | NA                                       |

*CO<sub>2</sub>e* carbon dioxide equivalent, *DPI* dry powder inhaler, *GHG* greenhouse gas, *ICS* inhaled corticosteroids, *LABA* long-acting  $\beta_2$ -agonist, *LAMA* long-acting muscarinic antagonist, *LCA* life cycle assessment, *SABA* short-acting  $\beta_2$ -agonist, *UAE* United Arab Emirates

\*Based on internal analysis by the authors using IQVIA MIDAS<sup>®</sup> data, reflecting estimates of real-world activity. Copyright IQVIA. All rights reserved

**Supplementary Table S4** Number of SABA prescriptions given to patients overusing SABA and associated GHG emissions based on prescription claims data in patients with asthma from the SABINA III cohort<sup>†</sup> [1] stratified by GINA treatment step, region and gross national income

|                                          | Number of SABA prescriptions in patients overusing SABA, n |                  | Total GHG emissions from SABA overuse*, tonnes CO <sub>2</sub> e |                  |
|------------------------------------------|------------------------------------------------------------|------------------|------------------------------------------------------------------|------------------|
|                                          | SABA with OTC                                              | SABA without OTC | SABA with OTC                                                    | SABA without OTC |
| Total (N=8351)                           | 35,867                                                     | 31,018           | 723                                                              | 611              |
| <b>GINA treatment step</b>               |                                                            |                  |                                                                  |                  |
| GINA steps 1–2 (n=1958)                  | 10,557                                                     | 9172             | 217                                                              | 184              |
| GINA steps 3–5 (n=6388)                  | 25,308                                                     | 21,846           | 507                                                              | 428              |
| <b>Geographical region</b>               |                                                            |                  |                                                                  |                  |
| Africa (n=1778)                          | 10,109                                                     | 8054             | 214                                                              | 166              |
| Latin America (n=1096)                   | 5672                                                       | 5098             | 122                                                              | 108              |
| Middle East (n=1389)                     | 7023                                                       | 6285             | 150                                                              | 132              |
| Asia Pacific (n=4088)                    | 13,064                                                     | 11,581           | 240                                                              | 208              |
| <b>Gross national income<sup>‡</sup></b> |                                                            |                  |                                                                  |                  |
| HICs (n=2336)                            | 10,492                                                     | 9481             | 224                                                              | 202              |
| UMICs (n=3764)                           | 17,512                                                     | 15,476           | 353                                                              | 303              |
| LMICs (n=2251)                           | 7864                                                       | 6061             | 144                                                              | 105              |

CO<sub>2</sub>e carbon dioxide equivalent, GHG greenhouse gas, GINA Global Initiative for Asthma, HIC high-income country, LMIC lower-middle-income country, OTC over-the-counter, SABA short-acting  $\beta_2$ -agonist, SABINA SABA use IN Asthma, UMIC upper-middle-income country, USD United States Dollar

\*SABA overuse is defined as use of  $\geq 3$  SABA canisters/year. Inhaler prescription data were used as surrogates for actual use

<sup>†</sup>Based on internal analysis by the authors using data from the SABINA III cohort

<sup>‡</sup>Gross national income per capita based on the 2020 World Bank classifications [8]: LMIC, 1046 USD–4095 USD; UMIC, 4096 USD–12,695 USD; HIC, >12,695 USD





## References

1. Bateman ED, Price DB, Wang HC, et al. Short-acting  $\beta_2$ -agonist prescriptions are associated with poor clinical outcomes of asthma: the multi-country, cross-sectional SABINA III study. *Eur Respir J*. 2022;59:2101402.
2. Intergovernmental Panel on Climate Change. Global warming potential values. [https://ghgprotocol.org/sites/default/files/ghgp/Global-Warming-Potential-Values%20%28Feb%2016%202016%29\\_1.pdf](https://ghgprotocol.org/sites/default/files/ghgp/Global-Warming-Potential-Values%20%28Feb%2016%202016%29_1.pdf). Accessed May 5, 2023.
3. Smith C, Nicholls ZRJ, Armour K, et al. The Earth's Energy Budget, Climate Feedbacks, and Climate Sensitivity-Supplementary Material. In: Masson-Delmotte V, Zhai P, Pirani A, et al, eds. *Climate Change 2021: The Physical Science Basis Contribution of Working Group I to the Sixth Assessment Report of the Intergovernmental Panel on Climate Change*. 2021.
4. Woodcock A, Beeh KM, Sagara H, et al. The environmental impact of inhaled therapy: making informed treatment choices. *Eur Respir J*. 2022;60:2102106.
5. Aumônier S, Whiting A, Norris S, et al. Carbon footprint assessment of Breezhaler® dry powder inhaler. presented at: Drug Delivery to the Lungs 2020; 9–11 December 2020 <https://ddl-conference.com/ddl2020-christmas-lectures/conference-papers/carbon-footprint-assessment-of-breezhaler-dry-powder-inhaler/>
6. Orion Pharma. Carbon life cycle assessment report for Orion Corporation: executive summary. 2022. <https://www.orion.fi/globalassets/documents/orion-group/sustainability/2020-orion-pharma-product-footprint-exec-summary.pdf>. Accessed May 5, 2023.
7. AstraZeneca. Product GHG Inventories Assessments ERM. 2021. Accessed May 5, 2023.
8. The World Bank. World Bank Country and Lending Groups. 2020. <https://datahelpdesk.worldbank.org/knowledgebase/articles/906519-world-bank-country-and-lending-groups>. Accessed May 5, 2023.
9. Janson C, Henderson R, Löfdahl M, Hedberg M, Sharma R, Wilkinson AJK. Carbon footprint impact of the choice of inhalers for asthma and COPD. *Thorax*. 2020;75:82–4.
10. Jeswani HK, Azapagic A. Life cycle environmental impacts of inhalers. *J Clean Prod*. 2019;237:117733.

11. Panigone S, Sandri F, Ferri R, Volpato A, Nudo E, Nicolini G. Environmental impact of inhalers for respiratory diseases: decreasing the carbon footprint while preserving patient-tailored treatment. *BMJ Open Respir Res.* 2020;7:e000571.
12. Borenus K, Vartiainen V, Takala A, et al. Life cycle assessment (LCA) and cradle-to-grave (CTG) carbon footprint of a multidose reservoir dry powder inhaler. *Eur Resp J.* 2020;56:3183.
13. Novartis. Case study\*: Breezhaler® Carbon Footprint. <https://www.novartis.com/esg/environmental-sustainability/climate/case-study-breezhaler-carbon-footprint>. Accessed May 5, 2023.
14. Hänsel M, Bambach T, Wachtel H. Reduced environmental impact of the reusable Respimat® Soft Mist™ Inhaler compared with pressurised metered-dose inhalers. *Adv Ther.* 2019;36:2487–92.
15. AstraZeneca. Life cycle assessment internal reports. Accessed May 5, 2023.
16. Sellers WFS. Asthma pressurised metered dose inhaler performance: propellant effect studies in delivery systems. *Allergy Asthma Clin Immunol.* 2017;13:30.
17. Wilkinson AJK, Braggins R, Steinbach I, Smith J. Costs of switching to low global warming potential inhalers. An economic and carbon footprint analysis of NHS prescription data in England. *BMJ Open.* 2019;9:e028763.
